# Supplementary figures and images for: Sample-to-analysis platform for rapid intracellular mass spectrometry from small numbers of cells
Source: Royal Society of Chemistry journal article supplement (doi:10.1039/d1lc00884f), 2021-01-01

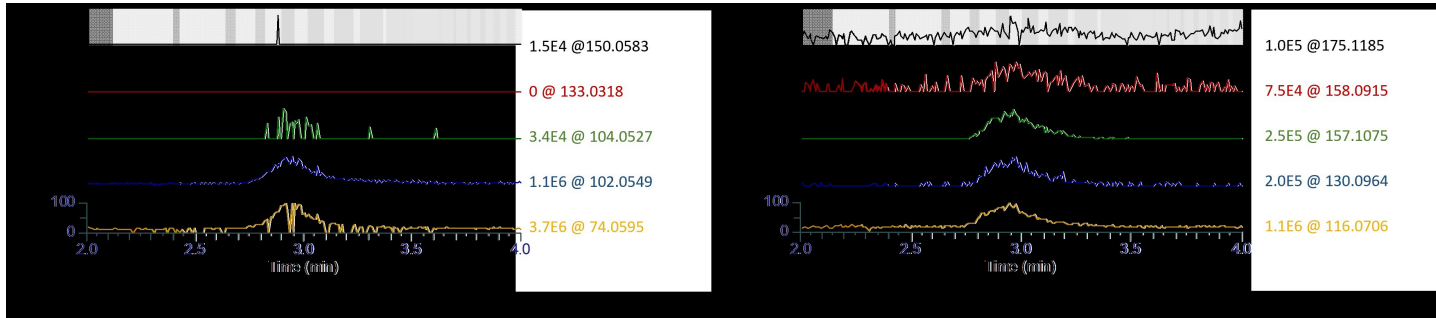

Supplement: d1lc00884f5.pdf [file d1lc00884f5.pdf]
